# Supplementary material for: Vibrational analysis of acetylcholine binding to the M2 receptor
Source: RSC Adv. 2021 Apr 7;11(21):12559–67. doi: 10.1039/d1ra01030a (PMC8696876; doi:10.1039/d1ra01030a)
Supplement: RA-011-D1RA01030A-s001 [file RA-011-D1RA01030A-s001.pdf]

## Supplementary Information

### Vibrational Analysis of Acetylcholine Binding to the M<sub>2</sub> Receptor

Kohei Suzuki<sup>a</sup>, Kota Katayama<sup>a,b</sup>, Yuji Sumii<sup>a</sup>, Tomoya Nakagita<sup>d</sup>, Ryoji Suno<sup>c</sup>, Hirokazu Tsujimoto<sup>d</sup>, So Iwata<sup>d</sup>, Takuya Kobayashi<sup>c,e</sup>, Norio Shibata<sup>a</sup>, Hideki Kandori<sup>a,b,\*</sup>

<sup>a</sup> Department of Life Science and Applied Chemistry, Nagoya Institute of Technology, Showa-ku, Nagoya 466-8555, Japan

<sup>b</sup> OptoBioTechnology Research Center, Nagoya Institute of Technology, Showa-ku, Nagoya 466-8555, Japan

<sup>c</sup> Department of Medical Chemistry, Kansai Medical University, Hirakata 573-1010, Japan

<sup>d</sup> Department of Cell Biology, Graduate School of Medicine, Kyoto University, Kyoto 606-8501, Japan

<sup>e</sup> Japan Agency for Medical Research and Development, Core Research for Evolutional Science and Technology (AMED-CREST), Tokyo 100-0004, Japan

\*Correspondence to: kandori@nitech.ac.jp

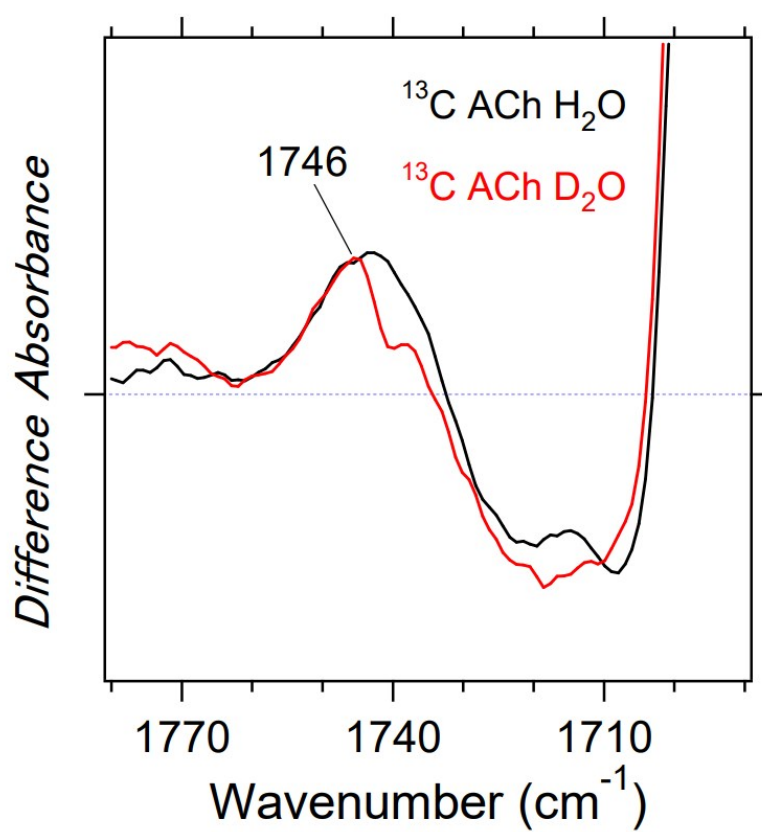

**Figure S1.** Difference ATR-FTIR spectra upon binding of 2- $^{13}\text{C}$ -labeled acetylcholine to  $\text{M}_2\text{R}$ . Black and red lines are the spectra in  $\text{H}_2\text{O}$  and  $\text{D}_2\text{O}$ , respectively. This figure is expanded from Figure 3b.

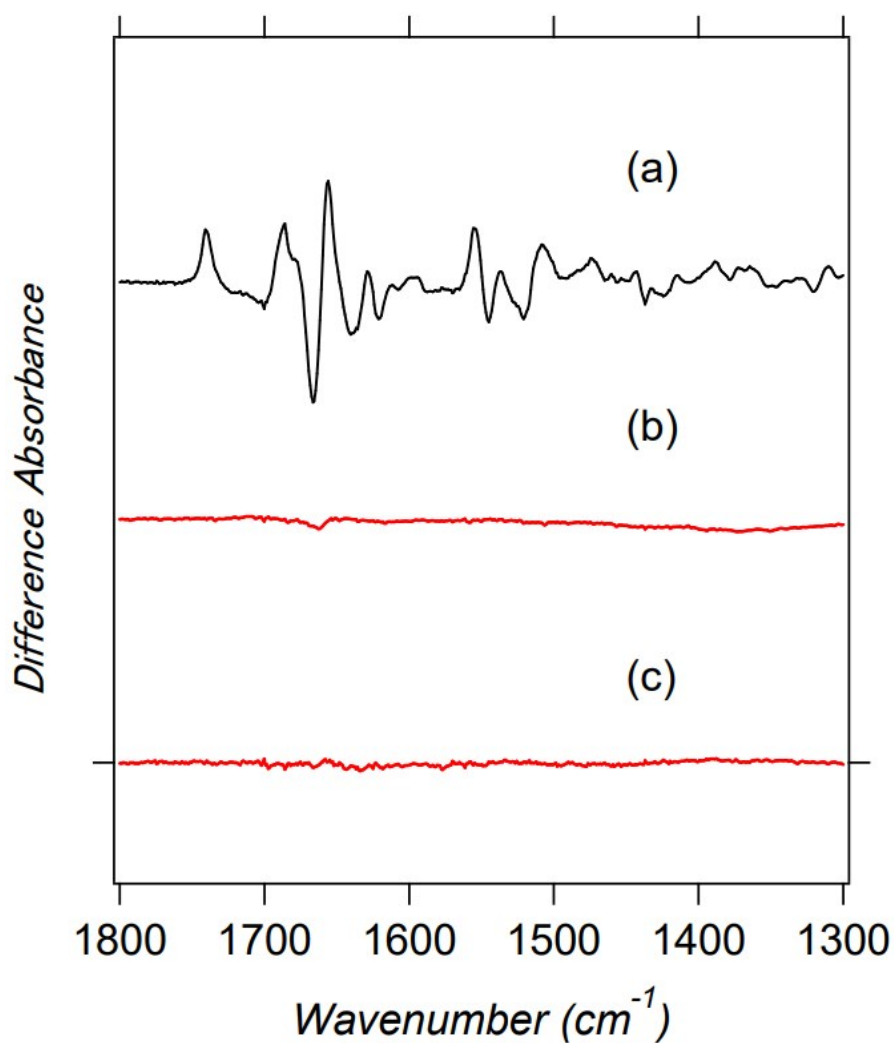

**Figure S2.** (a) Difference ATR-FTIR spectrum upon binding of acetylcholine (1 mM) to M<sub>2</sub>R, where concentration of NaCl is 140 mM. (b) Difference ATR-FTIR spectrum of M<sub>2</sub>R between NaCl and KCl (140 mM) in the absence of acetylcholine. (c) Difference ATR-FTIR spectrum of M<sub>2</sub>R between NaCl and KCl (140 mM) in the presence of acetylcholine (1 mM).

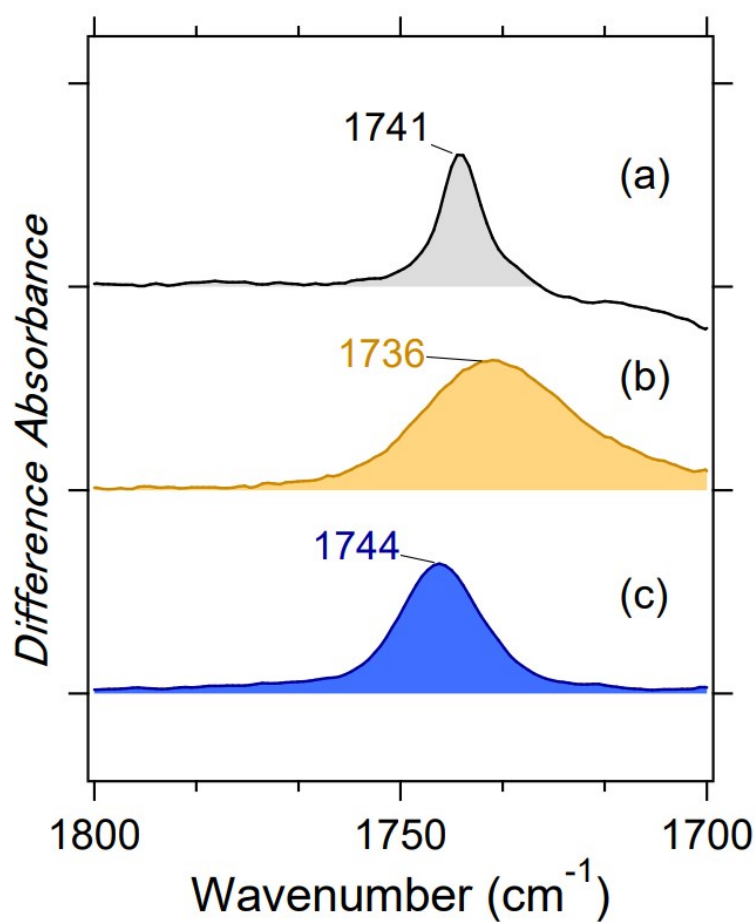

**Figure S3.** Spectral comparison of the C=O stretch of ACh in M<sub>2</sub>R (a), in aqueous solution (b), and in dimethylsulfoxide (DMSO) (c), where peak absorbances are normalized. (a) and (b) are reproduced from Figure 5b. In the gas phase, the C=O stretch of ACh is reported at 1751, 1778, and 1794 cm<sup>-1</sup>,<sup>22</sup> suggesting that the C=O stretches with and without hydrogen bond appear at 1750-1730 cm<sup>-1</sup> and 1795-1775 cm<sup>-1</sup>, respectively.
